# Supplementary material for: One-pot ionic liquid pretreatment and saccharification of switchgrass
Source: Royal Society of Chemistry journal article supplement (doi:10.1039/c3gc40545a), 2013-01-01
Supplement: c3gc40545a.pdf [file c3gc40545a.pdf]

Electronic Supplementary Information (ESI)

## **One-pot Ionic Liquid Pretreatment and Saccharification of Switchgrass**

Jian Shi<sup>1,2</sup>, John M. Gladden<sup>1,2</sup>, Noppadon Sathitsuksanoh<sup>1</sup>, Pavan Kambam<sup>3</sup>, Lucas Sandavol<sup>3</sup>,  
Debjani Mitra<sup>3</sup>, Sonny Zhang<sup>1</sup>, Steve W. Singer<sup>1,4</sup>, Anthe George<sup>1,2</sup>, Blake A. Simmons<sup>1,2</sup>, and  
Seema Singh<sup>1,2,\*</sup>

<sup>1</sup>Deconstruction Division, Joint BioEnergy Institute, Emeryville, CA

<sup>2</sup>Biological and Materials Science Center, Sandia National Laboratories, Livermore, CA

<sup>3</sup>The Advanced Biofuels Process Demonstration Unit (ABPDU), Lawrence Berkeley National  
Laboratory, Emeryville, CA

<sup>4</sup>Earth Sciences Division, Lawrence Berkeley National Laboratory, Berkeley, CA

**Table S1.** Assignments of the lignin  $^{13}\text{C}$ - $^1\text{H}$  correlation peaks in the 2D HSQC spectra of switchgrass cell wall and residual solids

| Label                                      | $\delta_{\text{C}}/\delta_{\text{H}}$ (ppm) | Assignment                                                                                           |
|--------------------------------------------|---------------------------------------------|------------------------------------------------------------------------------------------------------|
| MeO ( $-\text{OCH}_3$ )                    | 55.6/3.73                                   | C-H in methoxyls                                                                                     |
| $\text{A}_\alpha$                          | 70.9/4.71 and 4.83                          | $\text{C}_\alpha\text{-H}_\alpha$ in $\beta\text{-O-4'}$ substructure ( <b>A</b> )                   |
| $\text{A}_{\beta(\text{G})}$               | 83.4/4.27                                   | $\text{C}_\beta\text{-H}_\beta$ in $\beta\text{-O-4'}$ substructures ( <b>A</b> ) linked to a G unit |
| $\text{A}_{\beta(\text{S})}$               | 85.9/4.10                                   | $\text{C}_\beta\text{-H}_\beta$ in $\beta\text{-O-4'}$ substructures linked ( <b>A</b> ) to a S unit |
| $\text{D}_\alpha$                          | 83.3/4.81                                   | $\text{C}_\alpha\text{-H}_\alpha$ in dibenzodioxocin substructures ( <b>D</b> )                      |
| $\text{S}_{2,6}$                           | 103.8/6.69                                  | $\text{C}_2\text{-H}_2$ and $\text{C}_6\text{-H}_6$ in etherified syringyl units ( <b>S</b> )        |
| $\text{G}_2$                               | 110.9/6.99                                  | $\text{C}_2\text{-H}_2$ in guaiacyl units ( <b>G</b> )                                               |
| $p\text{CA}_\beta$ and $\text{FA}_\beta$   | 113.5/6.27                                  | $\text{C}_\beta\text{-H}_\beta$ in <i>p</i> -coumarate ( <b>pCA</b> ) and ferulate ( <b>FA</b> )     |
| $\text{G}_5/\text{G}_6$                    | 114.9/6.72 and 6.94<br>118.7/6.77           | $\text{C}_5\text{-H}_5$ and $\text{C}_6\text{-H}_6$ in guaiacyl units ( <b>G</b> )                   |
| $\text{H}_{2,6}$                           | 127.8/7.22                                  | $\text{C}_{2,6}\text{-H}_{2,6}$ in <i>p</i> -hydroxyphenyl units ( <b>H</b> )                        |
| $p\text{CA}_{2,6}$                         | 130.1/7.45                                  | $\text{C}_2\text{-H}_2$ and $\text{C}_6\text{-H}_6$ in <i>p</i> -coumarate ( <b>pCA</b> )            |
| $p\text{CA}_\alpha$ and $\text{FA}_\alpha$ | 144.7/7.41                                  | $\text{C}_\alpha\text{-H}_\alpha$ in <i>p</i> -coumarate ( <b>pCA</b> ) and ferulate ( <b>FA</b> )   |

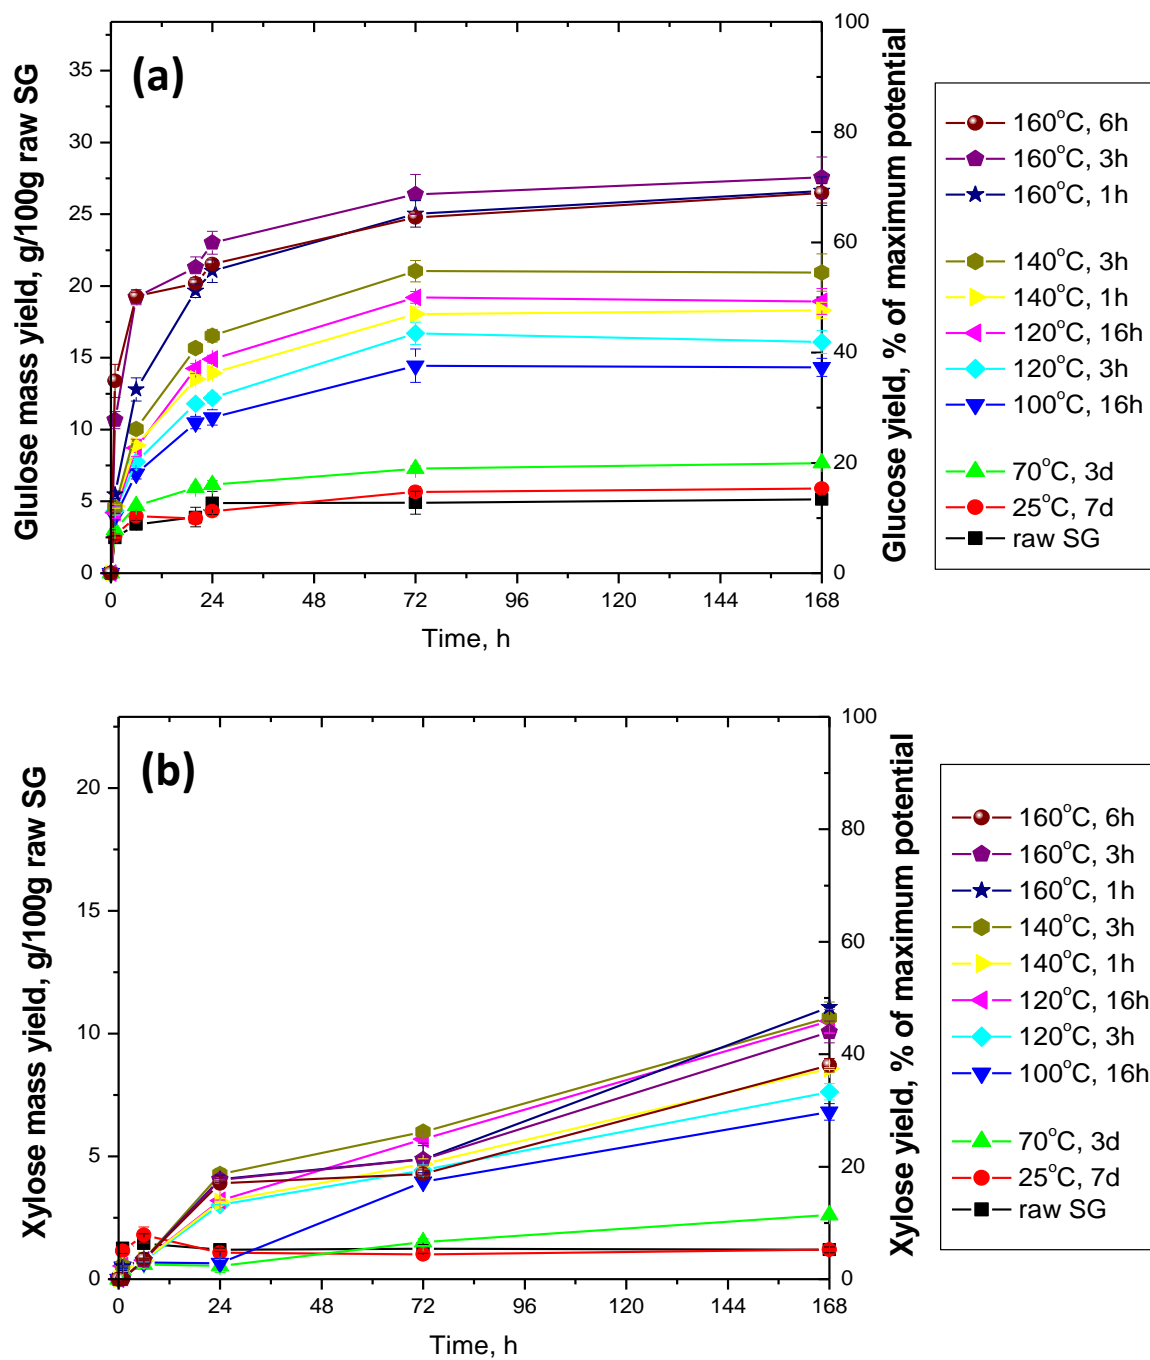

**Figure S1** Glucose and xylose release during 168h one-pot pretreatment and saccharification with different pretreatment conditions. JTherm loading: 5.75 mg/g starting biomass.

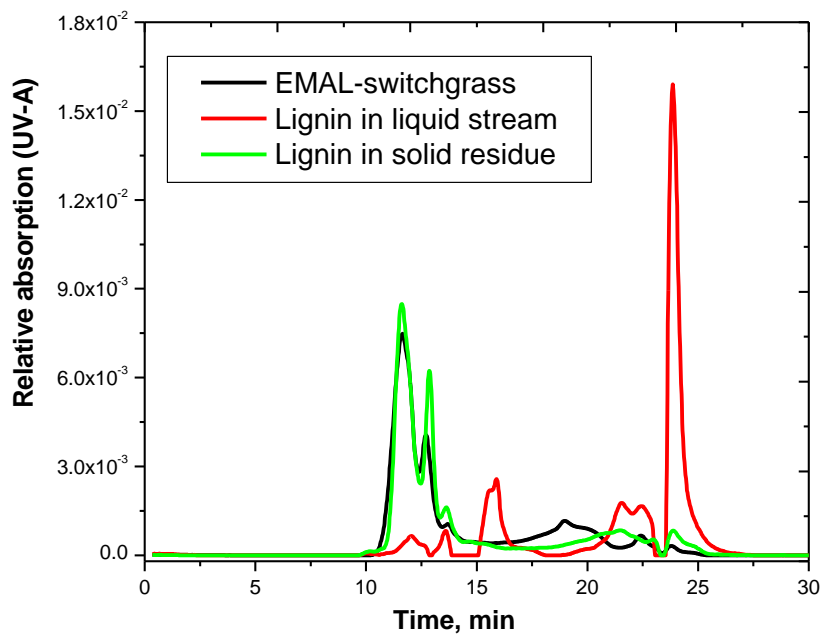

**Figure S2** Elution profiles of lignin in remaining in the liquid stream and residual solids after one-pot ionic liquid pretreatment and saccharification of switchgrass.

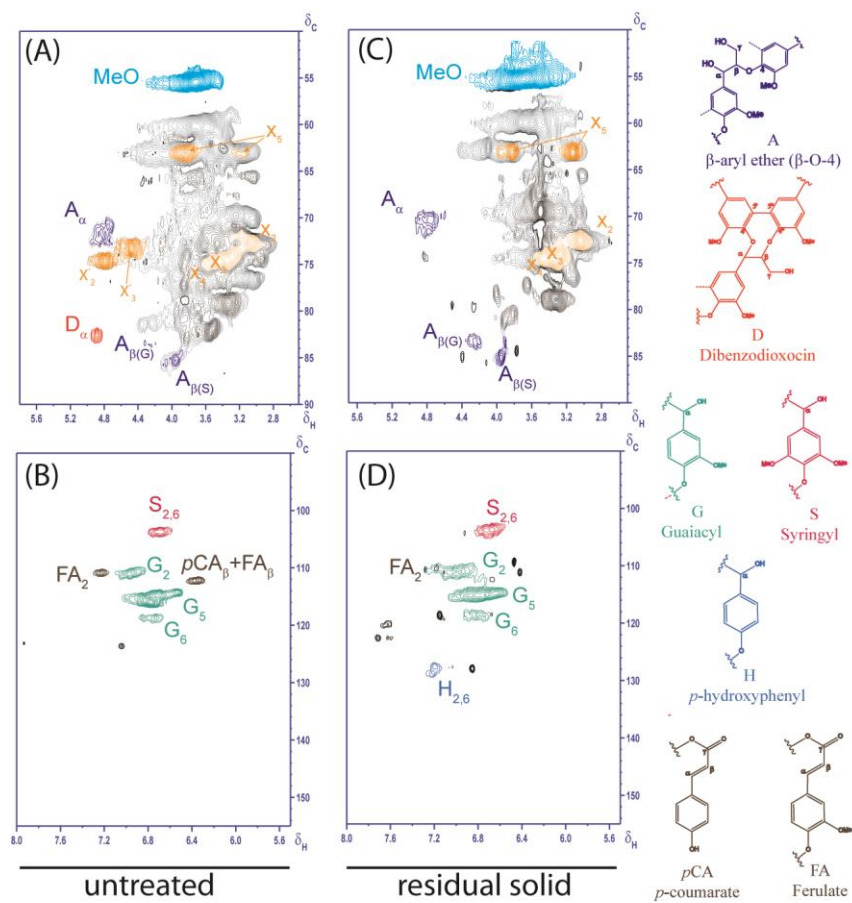

**Figure S3** Side chain ( $\delta_{\text{C}}/\delta_{\text{H}}$  50-90/2.5-5.8) and aromatic/unsaturated ( $\delta_{\text{C}}/\delta_{\text{H}}$  90-155/5.5-8.0)

regions in the 2D HSQC NMR spectra of untreated switchgrass (A and B) and residual (C and D).

**IL recycle:** We have demonstrated preliminary results for recycling [C<sub>2</sub>mim][OAc] from “one-pot” hydrolyzate and reuse of the recycled IL for the next batch of “one-pot” pretreatment and saccharification. Briefly, “one-pot” hydrolyzate was subjected to liquid-liquid sugar extraction using the boronic acid complex as described in manuscript. The pH of the sugar-extracted hydrolyzate was adjusted to 6.8 using 1M hydrochloric acid (HCl) and passed through sequential filtration including: 20 μm Steriflip filter unit (Millipore, Billerica, MA) → 0.2 μm PTFE syringe filter (Nalgene) → 50 kDa → 10 kDa → 3 kDa Amicon Ultra-15 Centrifugal Filter Units (Millipore, Billerica, MA). The filtered hydrolyzate was vacuum dried overnight with a lyophilizer (Labconco FreeZone 12, Kansas City, MO) and centrifuged at 3220 rcf for 10 min to remove any precipitates. IL recovery (%) was calculated based on the starting IL content in one-pot hydrolyzate. Water content of recycled IL was measured as ~9.7% using Karl Fischer titration method (Metrohm USA, Riverview, FL) and has been taken account into the calculation. After sequential filtration and vacuum evaporation, 90.8% IL, [C<sub>2</sub>mim][OAc] was recovered. Some of the IL might be lost due to wetting of the membranes we used or during transferring. Further improvements in technology developed during scale-up could generate cost-effective IL recycle technologies that are greater than 98% effective.

Proton (<sup>1</sup>H) NMR spectra of neat and recycled [C<sub>2</sub>mim][OAc] samples were acquired on a Bruker AV-500 NMR spectrometer with 16 scans for each sample at room temperature. DMSO-d<sub>6</sub> was used for providing lock frequency and as an internal reference. <sup>1</sup>H NMR of recycled IL confirmed preservation of [C<sub>2</sub>mim][OAc] in recycled IL as indicated by the presence of the triplet/quartet proton shift around 1.5 and 4.3ppm, as also showing in neat IL. The broadening of regions ~4ppm is probably due to the trace lignin or sugar residues in recycled IL (Figure S5). The recycled IL was used to pretreat switchgrass under identical conditions (160 °C, 3h, 10%

biomass loading) as with neat IL. Residual sugars in recycled IL have been subtracted during sugar yield calculation. Compared with neat IL, reuse of the recycled IL for the next batch of one-pot pretreatment and saccharification showed 93.5% and 89.2% of the original glucose and xylose yield, respectively (Figure S6).

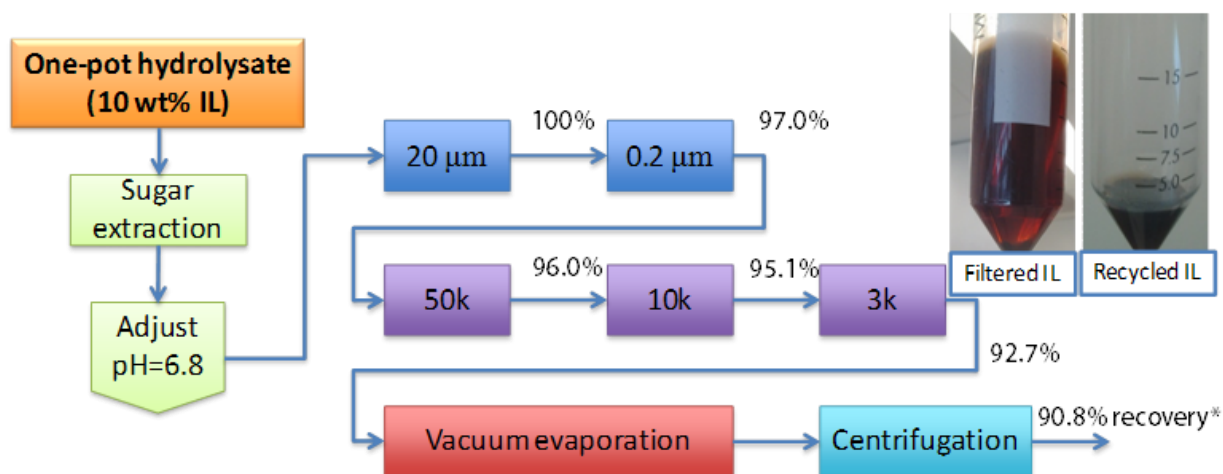

**Figure S4** Ionic liquid recycle from “one-pot” hydrolysate after liquid-liquid sugar extraction



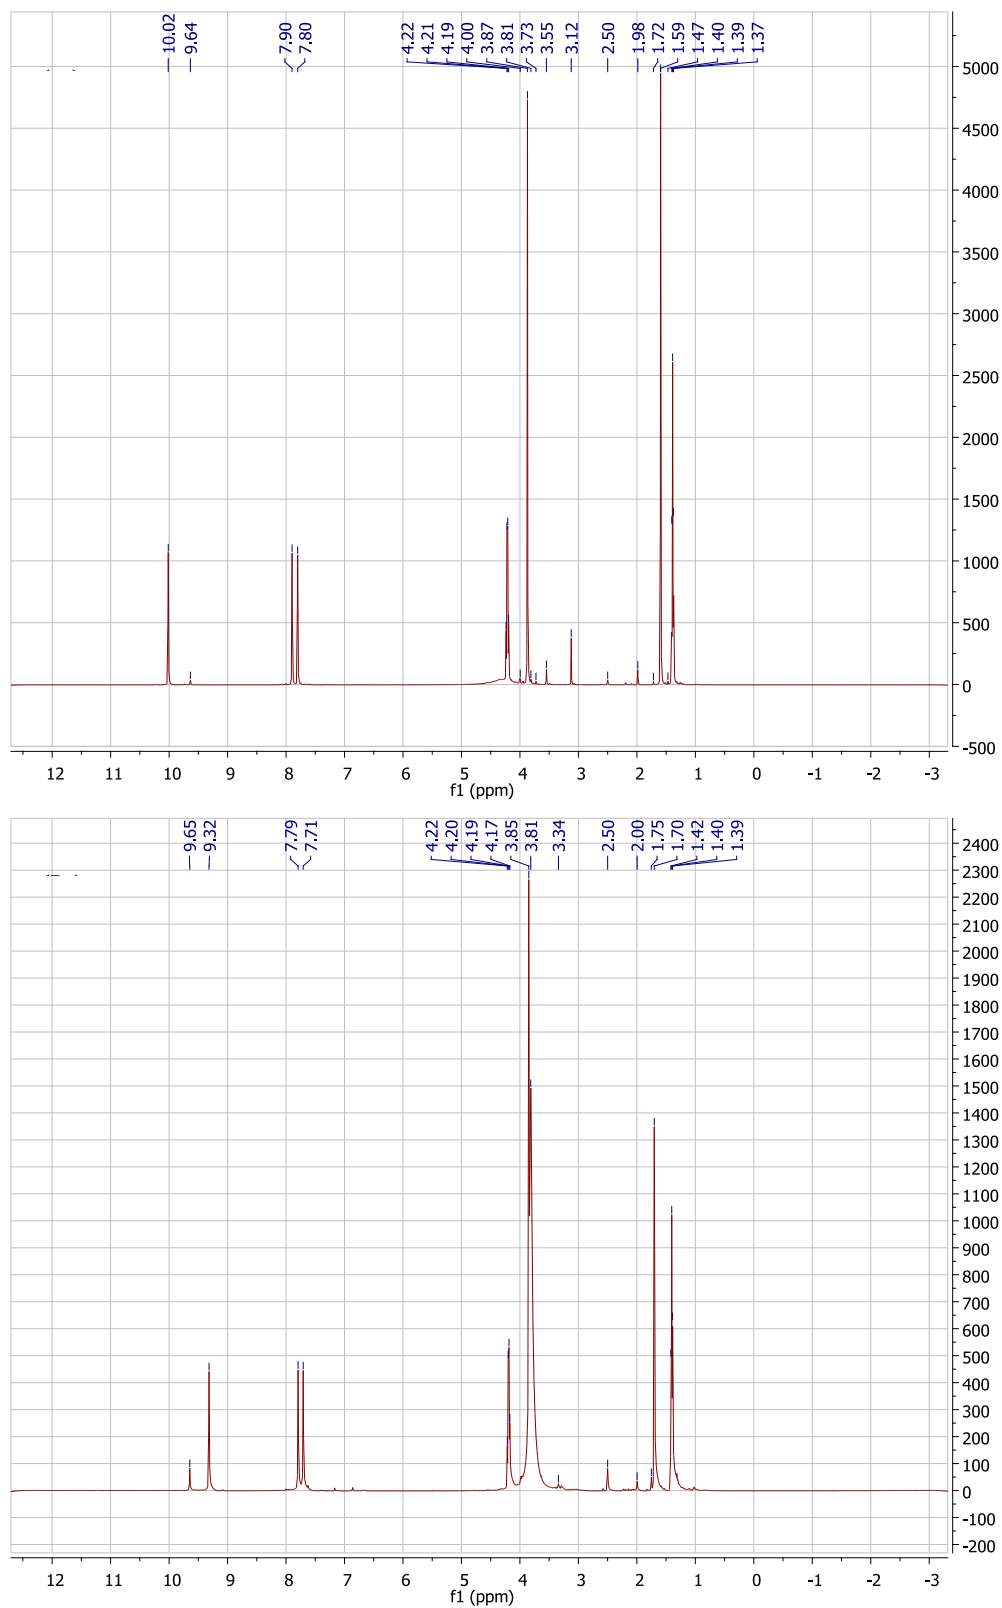

**Figure S5.** <sup>1</sup>H NMR for a) neat and b) recycled ionic liquid, [C<sub>2</sub>mim][OAc].

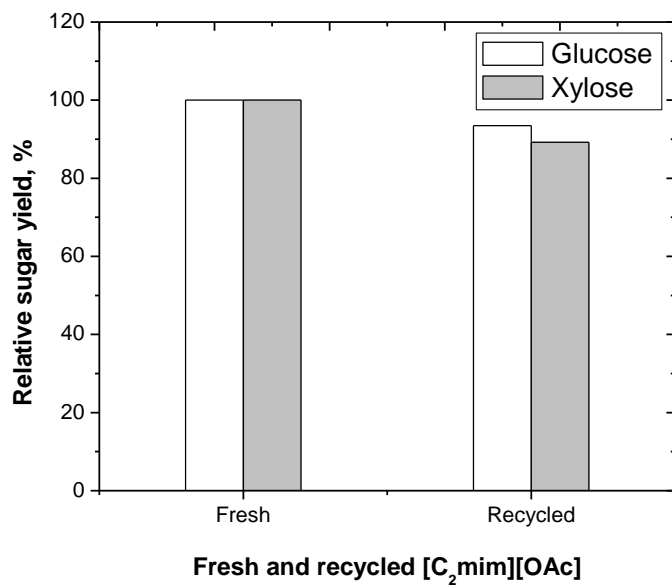

**Figure S6.** Sugar yields from one-pot pretreatment and saccharification using neat and recycled ionic liquid, [C<sub>2</sub>mim][OAc].
